# Supplementary material for: Synthesis, structures and magnetic properties of dysprosium(iii) complexes based on amino-bis(benzotriazole phenolate) and nitrophenolates: influence over the slow relaxation of the magnetization
Source: Royal Society of Chemistry journal article supplement (doi:10.1039/d1ce00909e), 2021-01-01
Supplement: d1ce00909e1.pdf [file d1ce00909e1.pdf]

## SUPPORTING INFORMATION

### **Synthesis, structures and magnetic properties of dysprosium(III) complexes based on amino-bis(benzotriazole phenolate) and nitrophenolates: influence over the slow relaxation of the magnetization**

Bo-Yi Chen,<sup>a</sup> Min-Yem Tsai,<sup>a</sup> Yu-Chia Su,<sup>a</sup> Po-Heng Lin\*<sup>a</sup> and Jérôme Long\*<sup>b,c</sup>

*a. Department of Chemistry, National Chung Hsing University, Taichung 402, Taiwan. E-mail: poheng@dragon.nchu.edu.tw*

*b. ICGM, Univ. Montpellier, CNRS, ENSCM, Montpellier, France. E-mail: jerome.long@umontpellier.fr*

*c. Institut Universitaire de France (IUF), 1 rue Descartes, 75231 Paris Cedex 05, France.*

## TABLE OF CONTENTS

|                                                                                                                                                                                                 |    |
|-------------------------------------------------------------------------------------------------------------------------------------------------------------------------------------------------|----|
| Figure S1: Intermolecular interactions in 1. The purple dashed lines account for the short contacts intermolecular interactions. ....                                                           | 3  |
| Figure S2: Intermolecular interactions in 2–4. The purple dashed lines account for the short contacts intermolecular interactions. ....                                                         | 4  |
| Figure S3: PXRD patterns for 1–4 and comparison with the simulated ones generated from single-crystal data. ..                                                                                  | 5  |
| Figure S4: Temperature dependence of $\chi T$ under an applied magnetic field of 1000 Oe for 1-4. Inset: field dependence of the magnetization at 1.8 K for 1-4. ....                           | 6  |
| Figure S5: Frequency dependence of $\chi'$ and $\chi''$ for 1-4 for various dc fields at 2 K. ....                                                                                              | 7  |
| Figure S6: Field dependence of the relaxation time for 1-4 at 2 K. The solid lines represent the fit with Eq. 1. ....                                                                           | 8  |
| Figure S7: Frequency dependence of $\chi'$ and $\chi''$ for 1-4 under a 500 Oe dc field. ....                                                                                                   | 9  |
| Figure S8: Cole-Cole (Argand) plots obtained using the ac susceptibility data for 1-4 in a 500 Oe dc field. The solid lines correspond to the fit obtained with a generalized Debye model. .... | 10 |
| Figure S9: Anisotropic axes (purple) obtained from the MAGELLAN package. <sup>1</sup> ....                                                                                                      | 11 |
| <br>                                                                                                                                                                                            |    |
| Table S1: Crystal data, data collection and structure refinement details for 1-4. ....                                                                                                          | 11 |
| Table S2: SHAPE analysis for 1. ....                                                                                                                                                            | 12 |
| Table S3: SHAPE analysis for 2-4. ....                                                                                                                                                          | 12 |
| Table S4: Fit parameters of the field dependence of the relaxation time for 1-4 at 2K. ....                                                                                                     | 12 |
| Table S5: Fitting of the Cole-Cole plots with a generalized Debye model under a 500 Oe dc field for 1. ....                                                                                     | 12 |
| Table S6: Fitting of the Cole-Cole plots with a generalized Debye model under a 500 Oe dc field for 2. ....                                                                                     | 13 |
| Table S7: Fitting of the Cole-Cole plots with a generalized Debye model under a 500 Oe dc field for 3. ....                                                                                     | 13 |
| Table S8: Fitting of the Cole-Cole plots with a generalized Debye model under a 500 Oe dc field for 4. ....                                                                                     | 13 |
| Table S9: Fitting of the Cole-Cole plots with a generalized Debye model under a 500 Oe dc field for 1-3. ....                                                                                   | 14 |

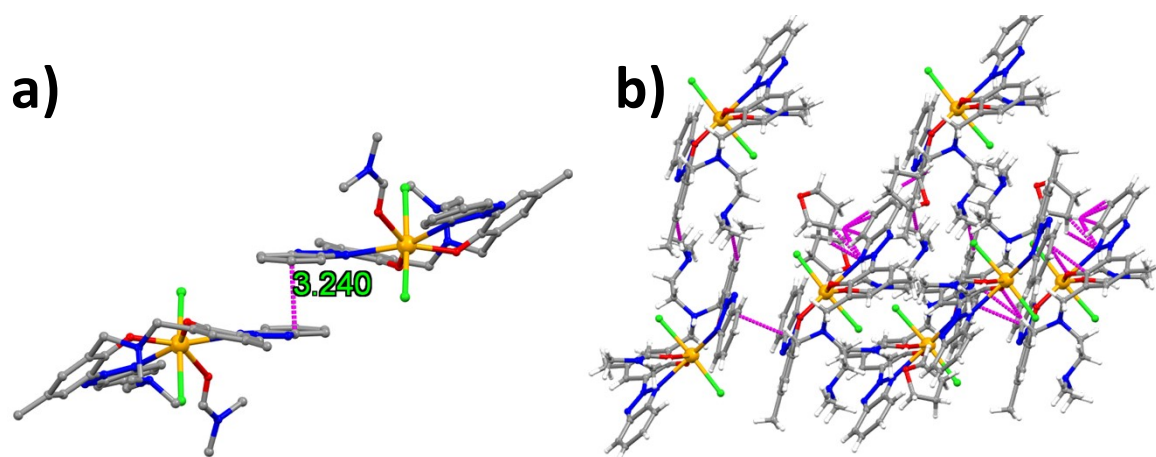

**Figure S1:** Intermolecular interactions in **1**. The purple dashed lines account for the short contacts intermolecular interactions.

2

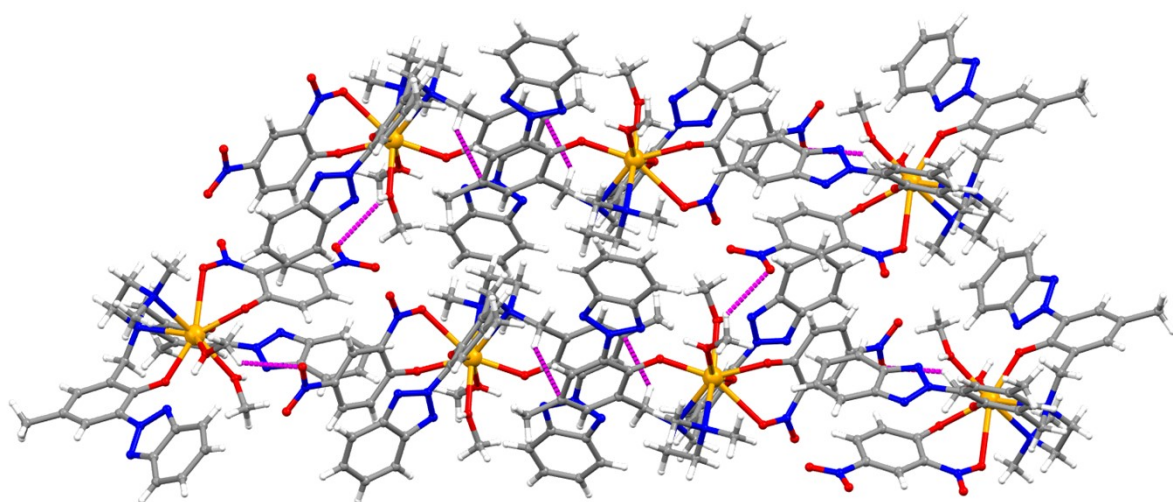

3

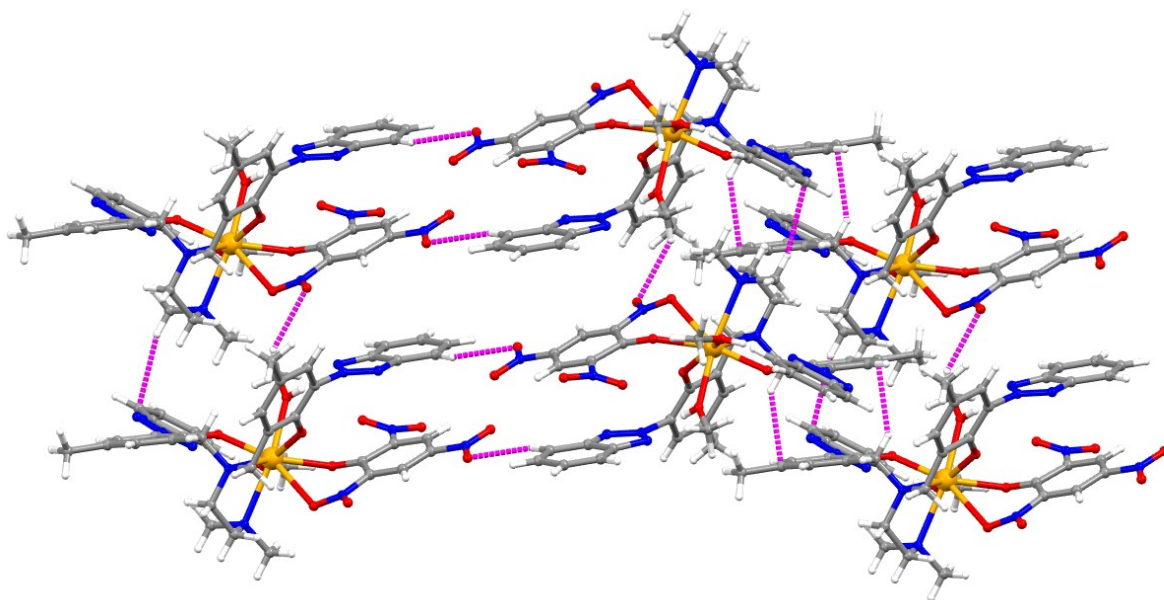

4

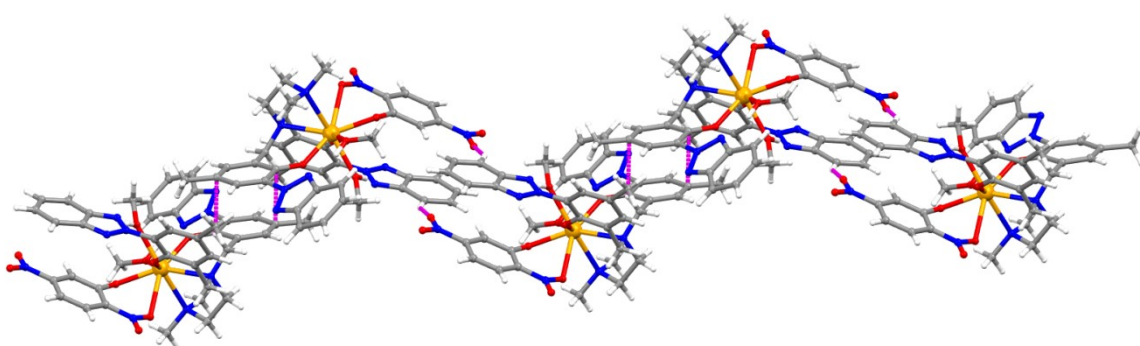

**Figure S2:** Intermolecular interactions in **2–4**. The purple dashed lines account for the short contacts intermolecular interactions.

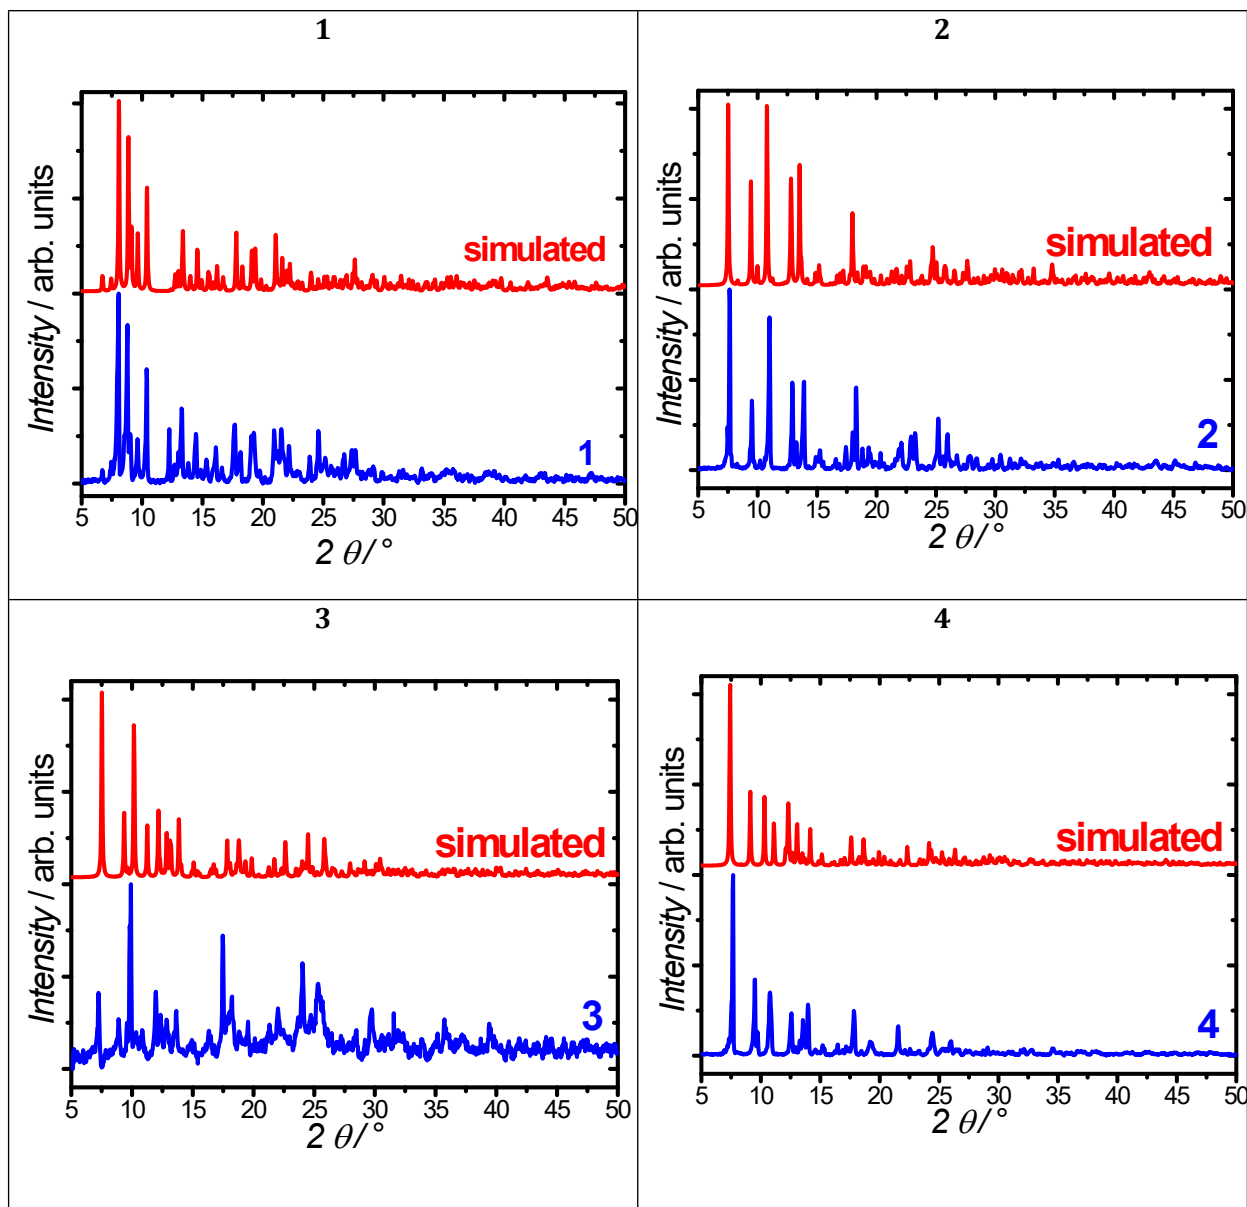

**Figure S3:** PXR D patterns for 1–4 and comparison with the simulated ones generated from single-crystal data.

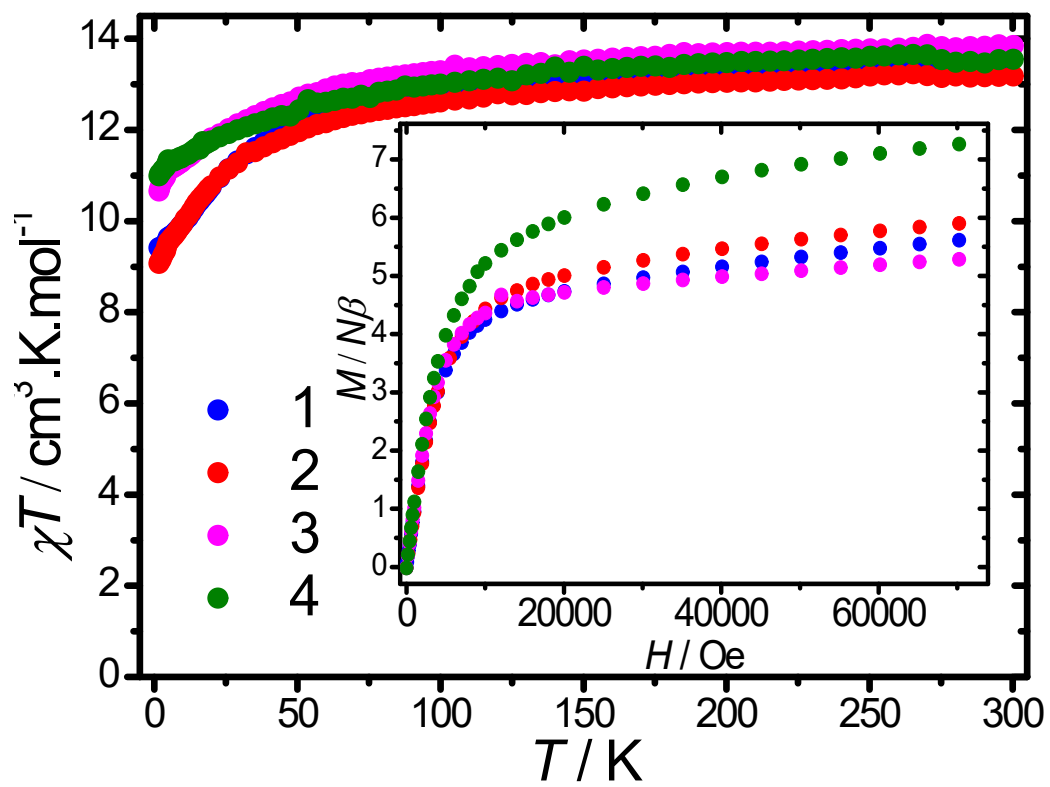

**Figure S4:** Temperature dependence of  $\chi T$  under an applied magnetic field of 1000 Oe for 1-4. Inset: field dependence of the magnetization at 1.8 K for 1-4.

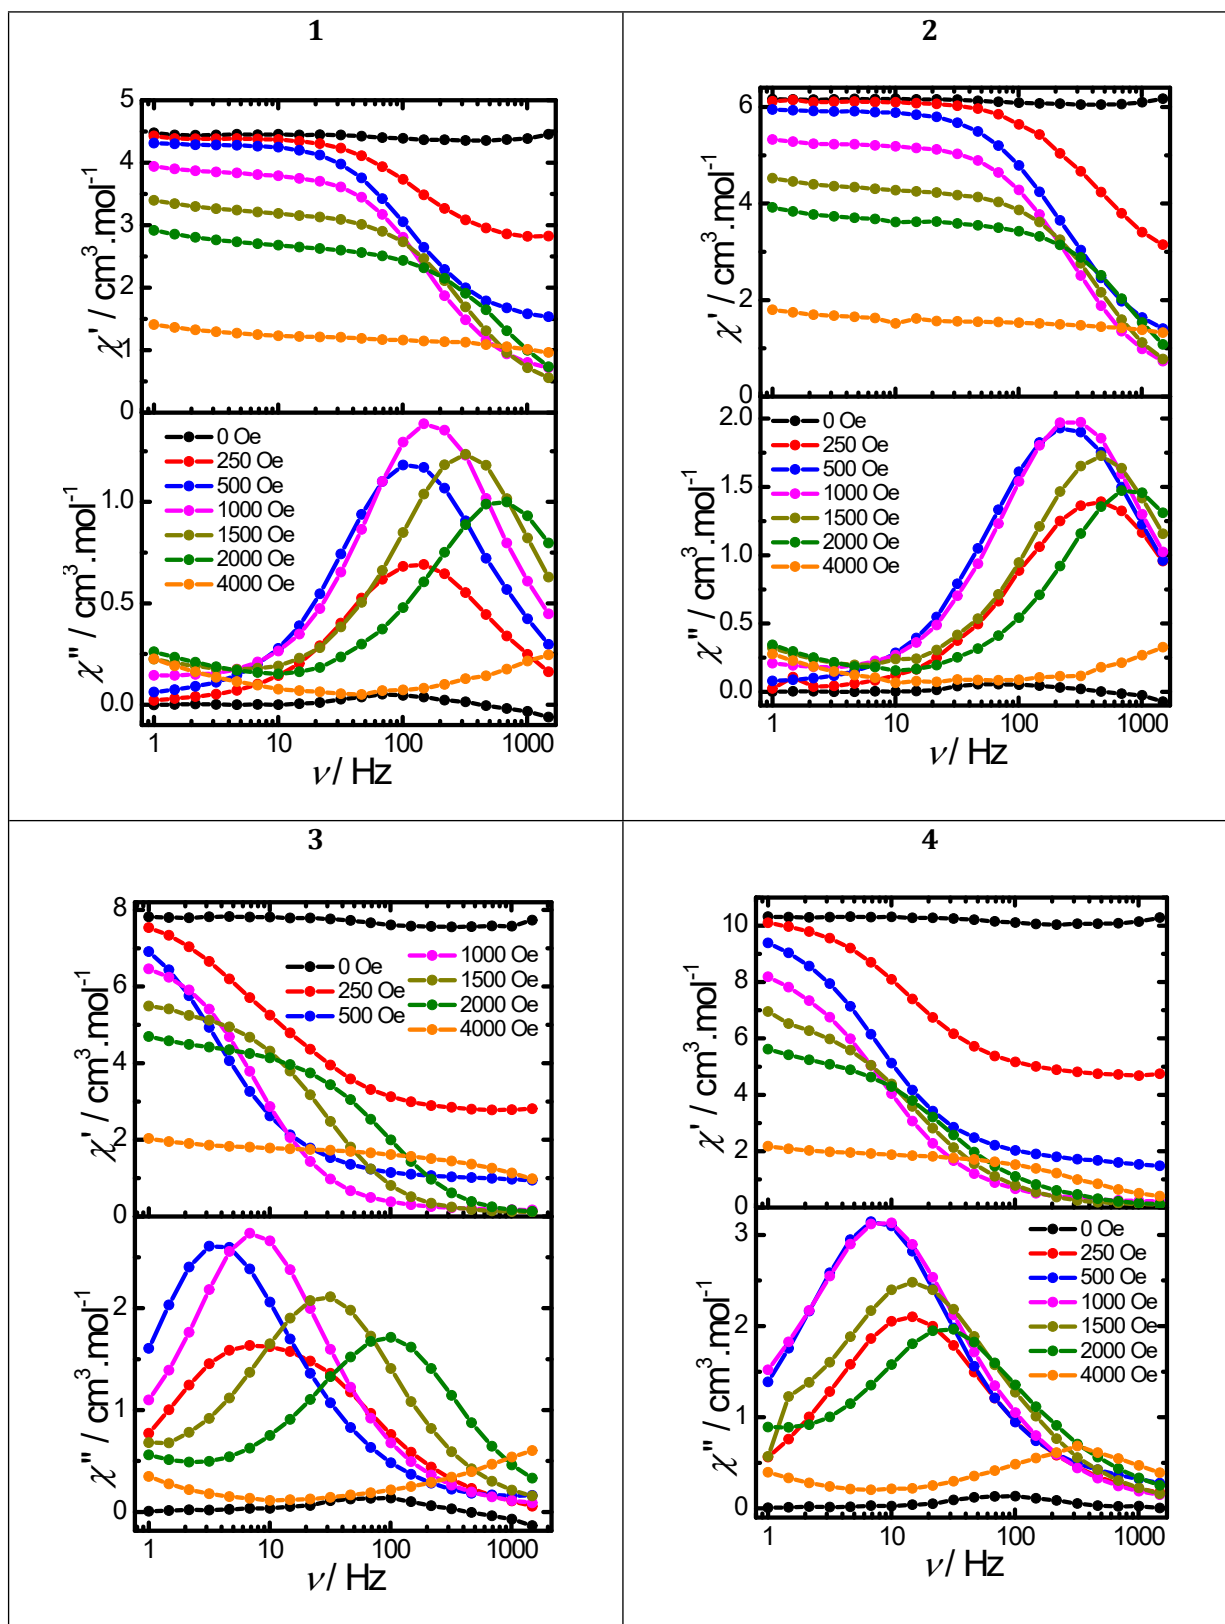

Figure S5: Frequency dependence of  $\chi'$  and  $\chi''$  for 1-4 for various dc fields at 2 K.



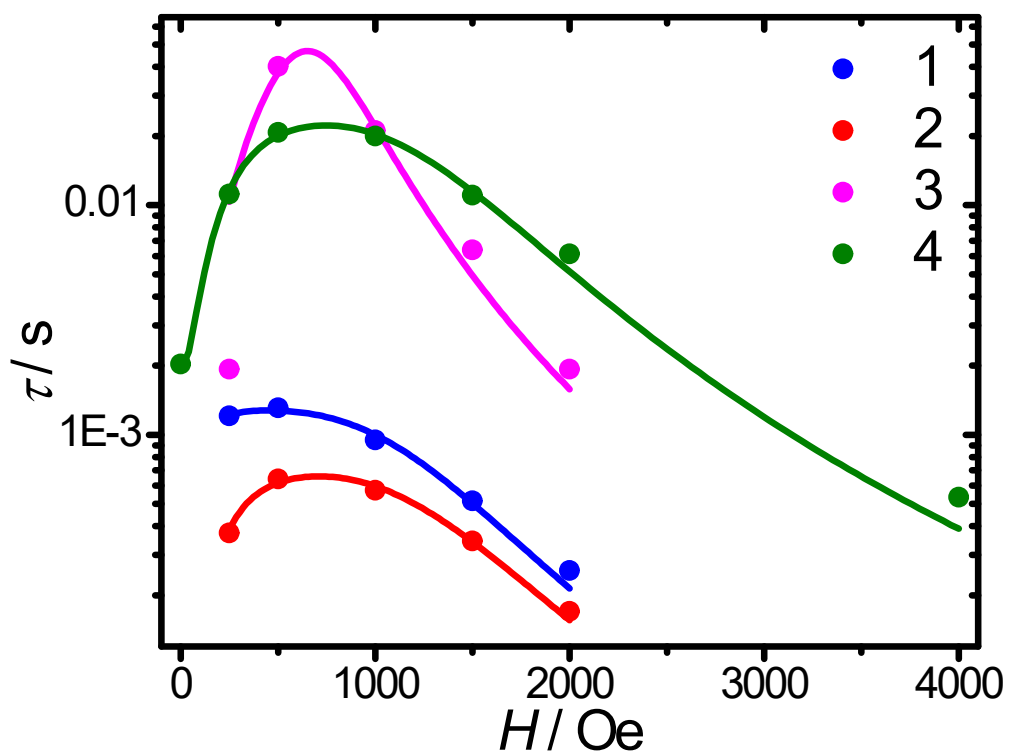

**Figure S6:** Field dependence of the relaxation time for 1-4 at 2 K. The solid lines represent the fit with Eq. 1.

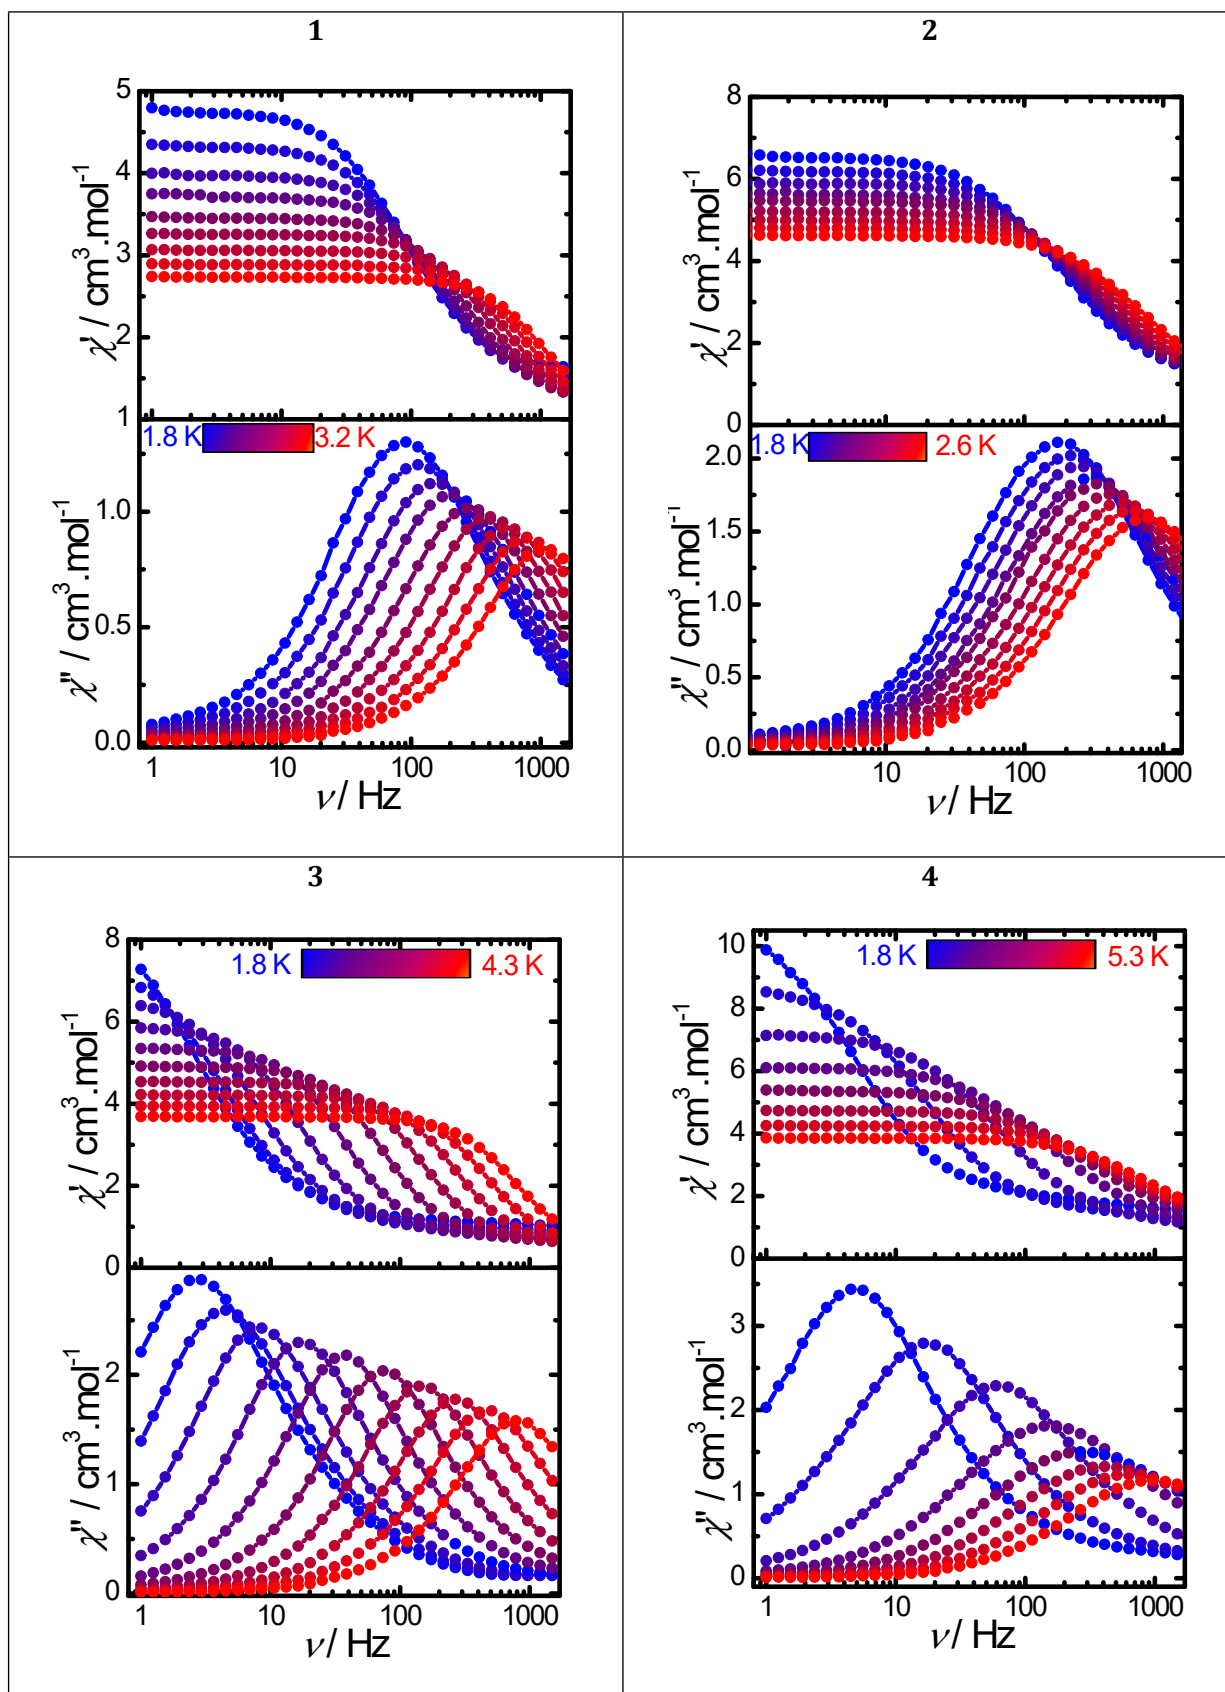

Figure S7: Frequency dependence of  $\chi'$  and  $\chi''$  for 1-4 under a 500 Oe dc field.

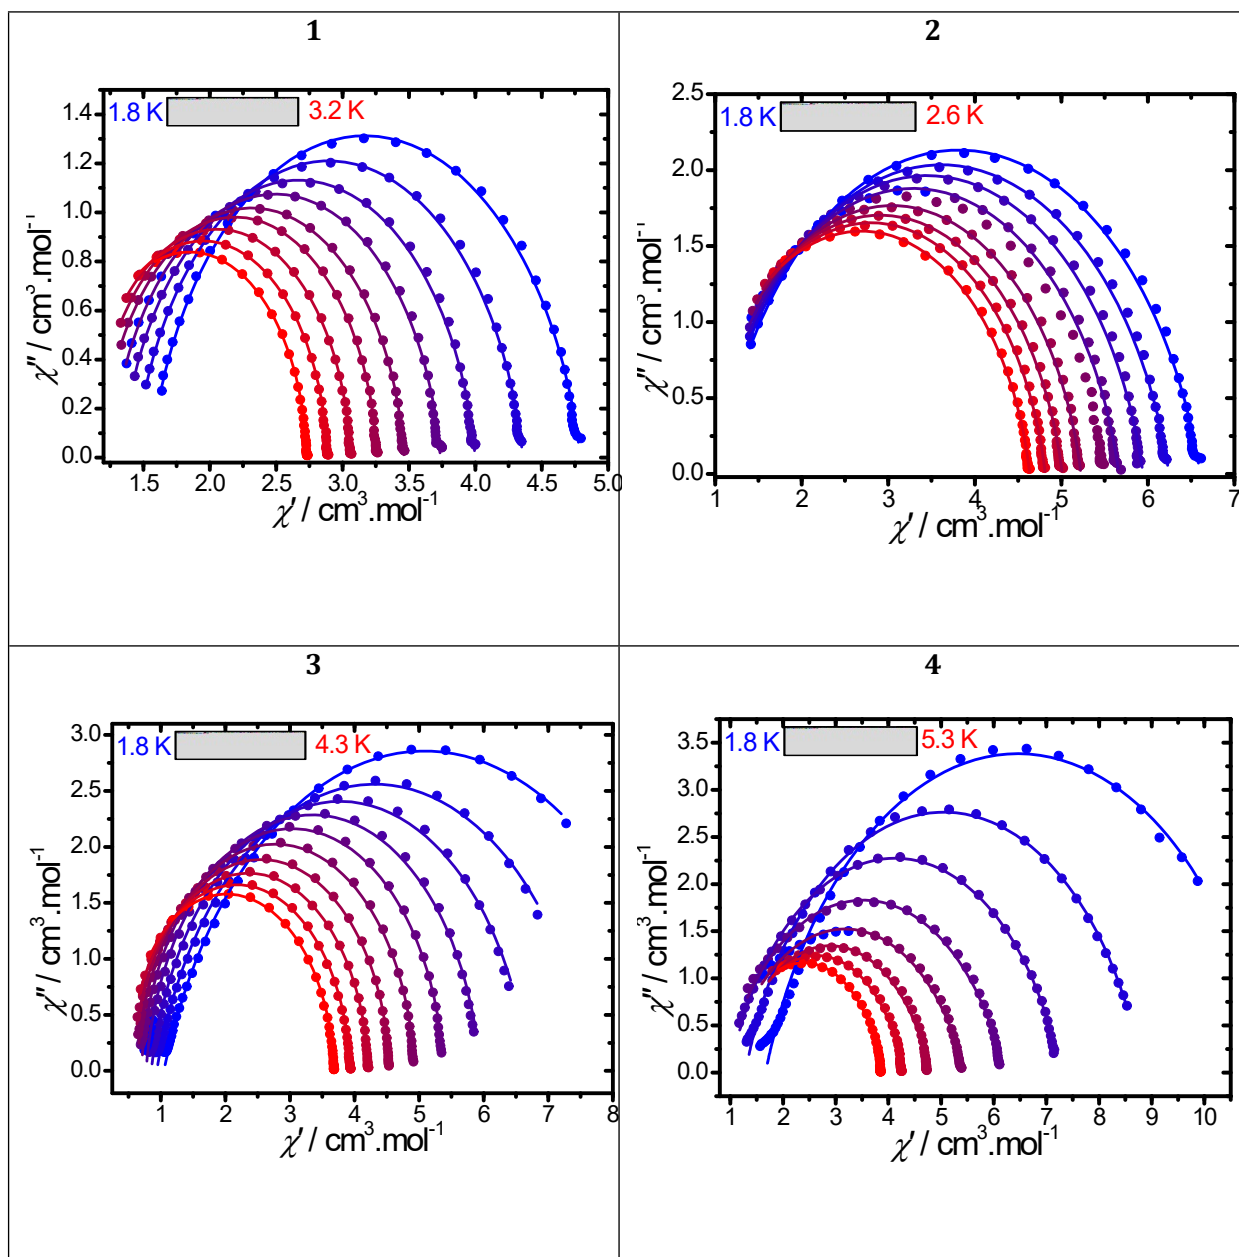

**Figure S8:** Cole-Cole (Argand) plots obtained using the ac susceptibility data for 1-4 in a 500 Oe dc field. The solid lines correspond to the fit obtained with a generalized Debye model.

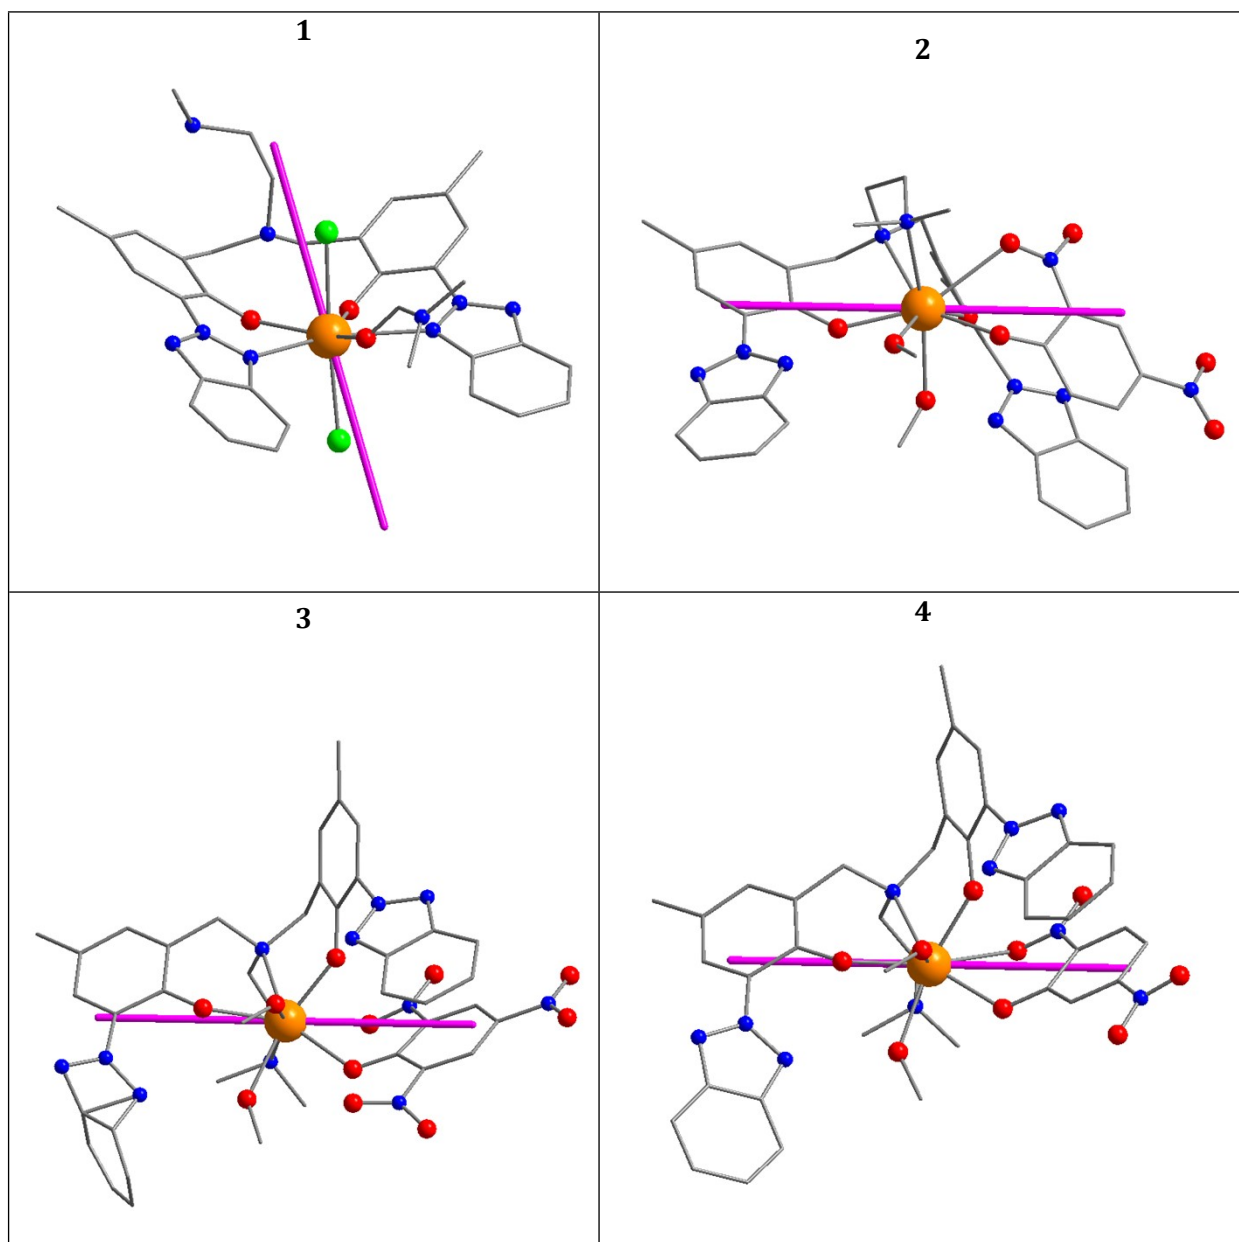

**Figure S9:** Anisotropic axes (purple) obtained from the MAGELLAN package.<sup>1</sup>

**Table S1:** Crystal data, data collection and structure refinement details for **1-4**.

|                                                | <b>1</b>                                                                        | <b>2</b>                                                         | <b>3</b>                                                          | <b>4</b>                                                         |
|------------------------------------------------|---------------------------------------------------------------------------------|------------------------------------------------------------------|-------------------------------------------------------------------|------------------------------------------------------------------|
| Formula                                        | C <sub>39</sub> H <sub>48</sub> Cl <sub>2</sub> DyN <sub>9</sub> O <sub>4</sub> | C <sub>40</sub> H <sub>43</sub> DyN <sub>10</sub> O <sub>9</sub> | C <sub>40</sub> H <sub>42</sub> DyN <sub>11</sub> O <sub>11</sub> | C <sub>40</sub> H <sub>43</sub> DyN <sub>10</sub> O <sub>9</sub> |
| <i>M</i>                                       | 1276.25                                                                         | 970.34                                                           | 1015.35                                                           | 970.34                                                           |
| <i>T</i> , K                                   | 120                                                                             | 293                                                              | 150                                                               | 150                                                              |
| Crystal system                                 | Triclinic                                                                       | Monoclinic                                                       | Triclinic                                                         | Triclinic                                                        |
| Space group                                    | <i>P</i> $\bar{1}$                                                              | <i>P</i> 2 <sub>1</sub> / <i>c</i>                               | <i>P</i> $\bar{1}$                                                | <i>P</i> $\bar{1}$                                               |
| <i>Z</i> ( <i>Z'</i> )                         | 2                                                                               | 4                                                                | 2                                                                 | 2                                                                |
| <i>a</i> , Å                                   | 12.7650(7)                                                                      | 11.8504(4)                                                       | 9.2418(4)                                                         | 9.1671(5)                                                        |
| <i>b</i> , Å                                   | 12.8233(8)                                                                      | 9.1104(3)                                                        | 11.8854(4)                                                        | 11.9694(8)                                                       |
| <i>c</i> , Å                                   | 14.6204(8)                                                                      | 37.8203(11)                                                      | 19.2808(7)                                                        | 19.5627(11)                                                      |
| $\alpha$ , °                                   | 76.975(5)                                                                       | 90                                                               | 81.334(3)                                                         | 84.620(5)                                                        |
| $\beta$ , °                                    | 64.278(5)                                                                       | 97.811(3)                                                        | 82.417(3)                                                         | 84.325(5)                                                        |
| $\gamma$ , °                                   | 68.218(6)                                                                       | 90                                                               | 88.254(3)                                                         | 88.419(5)                                                        |
| <i>V</i> , Å <sup>3</sup>                      | 1996.2(2)                                                                       | 4045.3(2)                                                        | 2075.24(14)                                                       | 2126.2(2)                                                        |
| <i>d</i> <sub>calcd</sub> , g·cm <sup>-3</sup> | 1.602                                                                           | 1.593                                                            | 1.625                                                             | 1.516                                                            |
| $\mu$ , mm <sup>-1</sup>                       | 1.524                                                                           | 1.916                                                            | 1.875                                                             | 1.823                                                            |
| <i>F</i> <sub>000</sub>                        | 954.0                                                                           | 1964.0                                                           | 1026.0                                                            | 982.0                                                            |
| <i>wR</i> <sub>2</sub> (all data)              | 0.0896( 9134)                                                                   | 0.0733( 9612)                                                    | 0.0915( 9594)                                                     | 0.1468( 9912)                                                    |
| <i>S</i> ( <i>F</i> <sup>2</sup> )             | 1.025                                                                           | 1.152                                                            | 1.009                                                             | 1.027                                                            |

**Table S2:** SHAPE analysis for **1**.

|          | HP     | HPY    | PBPY  | COC   | CTPR  | JPBPY | JETPY  |
|----------|--------|--------|-------|-------|-------|-------|--------|
| <b>1</b> | 34.094 | 23.519 | 1.127 | 6.918 | 5.363 | 6.395 | 21.885 |

HP: Heptagon ( $D_{7h}$ )  
 HPY: Hexagonal pyramid ( $C_{6v}$ )  
 PBPY: Pentagonal bipyramid ( $D_{5h}$ )  
 COC: Capped octahedron ( $C_{3v}$ )  
 CTPR: Capped trigonal prism ( $C_{2v}$ )  
 JPBPY: Johnson pentagonal bipyramid J13 ( $D_{5h}$ )  
 JETPY: Johnson elongated triangular pyramid J7 ( $C_{3v}$ )

**Table S3:** SHAPE analysis for **2-4**.

|          | SAPR  | TDD   | JGBF   | JETBPY | JBTPR | BTPR  |
|----------|-------|-------|--------|--------|-------|-------|
| <b>2</b> | 2.484 | 1.444 | 14.766 | 26.315 | 3.137 | 2.916 |
| <b>3</b> | 1.608 | 1.792 | 15.571 | 27.634 | 3.269 | 2.852 |
| <b>4</b> | 2.028 | 1.474 | 14.757 | 26.838 | 3.636 | 2.675 |

SAPR: Square antiprism ( $D_{4d}$ )  
 TDD: Triangular dodecahedron ( $D_{2d}$ )  
 JGBF: Johnson gyrobifastigium ( $D_{2d}$ )  
 JETBPY: Johnson elongated triangular bipyramid ( $D_{3h}$ )  
 JBTPR: Johnson biaugmented trigonal prism ( $C_{2v}$ )  
 BTPR: Biaugmented trigonal prism ( $C_{2v}$ )

**Table S4:** Fit parameters of the field dependence of the relaxation time for **1-4** at 2K.

| Compound | $D (s^{-1}K^{-1}Oe^{-4})$ | $B_1 (s^{-1})$     | $B_2 (Oe^{-2})$      | $K$    |
|----------|---------------------------|--------------------|----------------------|--------|
| <b>1</b> | $1.2 \times 10^{-10}$     | 123607.8           | 0.0288               | 751.9  |
| <b>2</b> | $1.60 \times 10^{-10}$    | $1.11 \times 10^6$ | 0.0135               | 1271.6 |
| <b>3</b> | $1.97 \times 10^{-11}$    | 188184.0           | 0.031                | 0      |
| <b>4</b> | $4.94 \times 10^{-12}$    | 490.1              | $1.4 \times 10^{-4}$ | 35.7   |

**Table S5:** Fitting of the Cole-Cole plots with a generalized Debye model under a 500 Oe dc field for **1**.

| $T$ (K) | $\chi_S (cm^3 \cdot mol^{-1})$ | $\chi_T (cm^3 \cdot mol^{-1})$ | $\alpha$ |
|---------|--------------------------------|--------------------------------|----------|
| 1.79963 | 1.54766                        | 4.7907                         | 0.1335   |
| 1.97499 | 1.43207                        | 4.35793                        | 0.11986  |
| 2.14985 | 1.33346                        | 3.99881                        | 0.10349  |
| 2.32508 | 1.24874                        | 3.73669                        | 0.09274  |
| 2.4997  | 1.17245                        | 3.46344                        | 0.07473  |
| 2.67457 | 1.11991                        | 3.25929                        | 0.05494  |
| 2.84954 | 1.06181                        | 3.05999                        | 0.04436  |
| 3.02452 | 1.0106                         | 2.88525                        | 0.0373   |
| 3.19959 | 0.96511                        | 2.73146                        | 0.03261  |

**Table S6:** Fitting of the Cole-Cole plots with a generalized Debye model under a 500 Oe dc field for 2.

| $T$ (K) | $\chi_S$ (cm <sup>3</sup> . mol <sup>-1</sup> ) | $\chi_T$ (cm <sup>3</sup> . mol <sup>-1</sup> ) | $\alpha$ |
|---------|-------------------------------------------------|-------------------------------------------------|----------|
| 1.79936 | 1.02569                                         | 6.604                                           | 0.16905  |
| 1.9     | 0.986                                           | 6.24475                                         | 0.16139  |
| 2.00028 | 0.95712                                         | 5.9439                                          | 0.15053  |
| 2.10008 | 0.90831                                         | 5.66586                                         | 0.14859  |
| 2.29982 | 0.8568                                          | 5.22764                                         | 0.13435  |
| 2.39971 | 0.80519                                         | 5.01057                                         | 0.1331   |
| 2.49973 | 0.79261                                         | 4.81403                                         | 0.12383  |
| 2.59967 | 0.74413                                         | 4.63523                                         | 0.12429  |

**Table S7:** Fitting of the Cole-Cole plots with a generalized Debye model under a 500 Oe dc field for 3.

| $T$ (K) | $\chi_S$ (cm <sup>3</sup> . mol <sup>-1</sup> ) | $\chi_T$ (cm <sup>3</sup> . mol <sup>-1</sup> ) | $\alpha$ |
|---------|-------------------------------------------------|-------------------------------------------------|----------|
| 1.79967 | 1.04904                                         | 9.12248                                         | 0.21596  |
| 2.07792 | 0.93811                                         | 7.68742                                         | 0.1736   |
| 2.35559 | 0.85282                                         | 6.70032                                         | 0.12307  |
| 2.63305 | 0.77302                                         | 5.94464                                         | 0.07799  |
| 2.91074 | 0.69994                                         | 5.3797                                          | 0.05     |
| 3.18852 | 0.63192                                         | 4.92348                                         | 0.03687  |
| 3.46641 | 0.56504                                         | 4.5411                                          | 0.03304  |
| 3.74452 | 0.50017                                         | 4.2131                                          | 0.032    |
| 4.02173 | 0.43029                                         | 3.93332                                         | 0.03348  |
| 4.2984  | 0.35887                                         | 3.68131                                         | 0.03237  |

**Table S8:** Fitting of the Cole-Cole plots with a generalized Debye model under a 500 Oe dc field for 4.

| $T$ (K) | $\chi_S$ (cm <sup>3</sup> . mol <sup>-1</sup> ) | $\chi_T$ (cm <sup>3</sup> . mol <sup>-1</sup> ) | $\alpha$ |
|---------|-------------------------------------------------|-------------------------------------------------|----------|
| 1.82498 | 1.66792                                         | 11.2442                                         | 0.21667  |
| 2.29998 | 1.28936                                         | 8.82139                                         | 0.19413  |
| 2.79985 | 0.99367                                         | 7.25938                                         | 0.20041  |
| 3.29974 | 0.85294                                         | 6.19488                                         | 0.23544  |
| 3.80027 | 0.91775                                         | 5.4362                                          | 0.24471  |
| 4.29837 | 1.01706                                         | 4.77616                                         | 0.20888  |
| 4.79944 | 1.01236                                         | 4.27383                                         | 0.17187  |
| 5.29977 | 0.92491                                         | 3.86989                                         | 0.14742  |

**Table S9:** Fitting of the Cole-Cole plots with a generalized Debye model under a 500 Oe dc field for 1-3.

| Compound | $n$             | $C (s^{-1}.K^{-n})$ |
|----------|-----------------|---------------------|
| <b>1</b> | $5.1 \pm 0.2$   | $17 \pm 3$          |
| <b>2</b> | $4.1 \pm 0.2$   | $92 \pm 13$         |
| <b>3</b> | $7.82 \pm 0.02$ | $0.056 \pm 0.002$   |

## References

- 1 N. F. Chilton, D. Collison, E. J. L. McInnes, R. E. P. Winpenny and A. Soncini, *Nat. Commun.*, 2013, **4**, 2551.
